# Supplementary material
Source: Elsevier journal article supplement (https://www.sciencedirect.com/science/article/pii/S2444382419300422)
Supplement: mmc2 [file S2444382419300422:mmc2.doc]

**Anexo 2**. Riesgo de CCR y neoplasia colorrectal avanzada tras la resección de lesiones serradas

| **Año** | **Título** | **Revista** | **Primer autor** | **Diseño del estudio** | **Objetivo primario** | **Sujetos** | **Variable** | **Eventos** | **Resultados** |
| --- | --- | --- | --- | --- | --- | --- | --- | --- | --- |
| **2008** | *“Five-year risk of colorectal neoplasia after negative screening colonoscopy”* | N Engl J Med | Imperiale TF, et al.40 | Observacional retrospectivo | **Incidencia de adenomas avanzados y neoplasia avanzada a los 5 años.** | - 199 pacientes con pólipos hiperplásicos en la colonoscopia basal - 1057 pacientes sin pólipos hiperplásicos en la colonoscopia basal | **Adenomas avanzados**:  1cm o DAG o componente velloso  **Neoplasia avanzada**:   adenoma avanzado o CCR | **Pólipos hiperplásicos**   - Cualquier adenoma: 24% - Adenomas avanzados: 2 %   **Sin pólipos**   - Cualquier adenoma: 15% - Adenomas avanzados: 1 % | Pólipos hiperplásicos frente a sin pólipos:   - **Cualquier adenoma:** OR 1.98 (IC95 % 1.45-2.71) - **Adenomas avanzados:** OR 1.80 (IC95% 0.56-5.74) |
| **2009** | *“Hyperplastic polyps and the risk of adenoma recurrence in the polyp prevention trial”* | Clin Gastro-enterol Hepatol | Laiyemo AO, et al.95 | Observacional retrospectivo | **Incidencia de adenomas metacronos en pacientes con pólipos hiperplásicos y adenomas** |  |  | - Seguimiento: 3 años - Riesgo de adenomas: OR 1.2 (IC95% 0.9-1.2) - Riesgo adenomas avanzados: OR 1.3 (IC95% 0.8-2.0).   Sin asociación entre la localización de los pólipos hiperplásicos y la recidiva de adenomas:   - Proximales: OR 1.0 (IC95% 0.7-1.5) - Distales: OR 1.3 (IC95% 0.96-1.7) | |
| **2010** | *“Proximal and large hyperplastic and nondysplastic serrated polyps detected by colonoscopy are associated with neoplasia”* | Gastro-enterology | Schreiner, MA.26 | Observacional prospectivo | **Determinar si la presencia de PS proximales sin displasia en la colonoscopia basal o en la vigilancia se asocia con neoplasia avanzada** | PS sin displasia | Total pacientes: 3121   - 1371 acudieron a la vigilancia   . | - Seguimiento: 5.5 años   Riesgo de adenomas en la vigilancia:   - **En ausencia de otras lesiones en la colonoscopia basal:** - Riesgo de adenomas: OR 3.1 (IC95% 1.6-6.2). - Riesgo de neoplasia avanzada: OR 2.1 (IC95 % 0.4-9,9). - **Adenomas tubulares en la colonoscopia basal:** - Riesgo de adenomas: OR 0.96 (IC95% 0.6-1.6). - Riesgo de neoplasia avanzada: OR 1.2 (IC95 % 0.5-3.3). | |

| **Año** | **Título** | **Revista** | **Primer autor** | **Diseño del estudio** | **Objetivo primario** | **Sujetos** | **Variable** | **Eventos** | | **Resultados** |
| --- | --- | --- | --- | --- | --- | --- | --- | --- | --- | --- |
| **2014** | *“Prevalence of serrated polyps and association with synchronous advanced neoplasia in screening colonoscopy”* | Endos-copy | Hazewinkel Y.29 | Transversal sobre ECA | **Incidencia de neoplasia avanzada sincrónica**  entre los subtipos de PS. | - Total pacientes: 1426 - Hiperplásicos: 23.8% - SSA: 4.8% - TSA: 0.1% | **Adenomas avanzados**:  1cm o DAG o componente velloso  **Neoplasia avanzada**:   adenomas avanzados o CCR | - ≥1 adenoma: 419 (29.4%) - ≥1 adenomas avanzados: 125 (8.8%) - CCR: 8 - Neoplasia avanzada: 130 (9.1%) | | Asociación con neoplasia avanzada sincrónica…   - Pólipos hiperplásicos proximales: OR 1.95 (IC95% 1.13-3.36) - Pólipos hiperplásicos ≥ 10mm: OR 3.18 (IC95% 1.11-9.07) - SSA Proximales: OR 3.04 (IC95% 1.50-6.15) - SSA ≥ 10mm: OR 5.02 (IC95% 1.69-14.86) |
| **2015** | *“Long-term risk of colorectal cancer in individuals with serrated polyps”* | Gut | Holme O, et al.27 | Observacional sobre ECA | **Incidencia de CCR** en pacientes con ≥1 PS de ≥10mm en comparación con pacientes con adenomas en el cribado y evaluar los factores de riesgo de CCR a 10 años | **PS**: ≥10 mm | **Adenomas avanzados (AA)**: ≥3 adenomas o ≥1 adenoma y ≥10 mm, velloso o DAG. | Total pacientes: 12955   - Sin pólipos: 10685 - Sin adenomas avanzados: 1488 - PS ≥10mm: 81 - Adenomas avanzados: 701   **Casos de CCR tras 10.9 años de media de seguimiento**:   - Sin pólipos: 99 (0.9%) - Sin adenomas avanzados: 16 (1%) - PS ≥10mm: 3 (3.7%) - Adenomas avanzados: 24 (3.4%) | | HR ajustada de CCR tras 10.9 años de media de seguimiento:   - Sin pólipos: 1.0 - Sin adenomas avanzados: 1.1 (0.6-1.9) - PS ≥10mm: 4.2 (1.3-13.3) - Adenomas avanzados: 3.3 (2.1-5.2) |
| **2015** | *“Increased risk of colorectal cancer development among patientes with serrated polyps”* | Gastro-enterology | Erichsen R, et al.25 | Casos-control anidado | **Riesgo de CCR** en pacientes con antecedentes de PS  (SSA o TSA) | - Total pacientes: 272342 - Casos CCR: 2045 - Controles: 8105 | **SSA**:   - Casos: 79 (3.9%) - Controles: 142 (1.8%) - OR 3.07 (2.30-4.10)   **SSA displasia**:   - Casos: 20 (1.0%) - Controles: 25 (0.3%) - OR 4.76 (2.59-8.73) - 10 años de riesgo de CCR: 4.43%   **SSA sin displasia**:   - Casos: 59 (2.9%) - Controles: 117 (1.4%) - OR 2.75 (1.99-3.80) - 10 años de riesgo de CCR: 2.56% | | **TSA:**   - Casos: 14 (0.7%) - Controles: 17 (0.2%) - OR 4.84 (2.36-9.93) - 10 años de riesgo de CCR: 4.50%   **Adenomas convencionales:**   - Casos: 757 (37%) - Controles: 1698 (21%) - OR 2.51 (2.25-2.80) - 10 años de riesgo de CCR: 2.33%   **Hiperplásicos**:   - Casos: 105 (5.1%) - Controles: 356 (4.4%) - OR 1.69 (1.34-2.14) - 10 años de riesgo de CCR: 1.21% | |

*CCR: cáncer colorrectal; DAG: displasia de alto grado; ECA: ensayo clínico aleatorizado; PS: pólipo serrado; SSA: adenoma serrado sesil, TSA: adenoma serrado tradicional.*
